# Supplementary material for: Platelet-like CuS impregnated with twin crystal structures for high performance sodium-ion storage
Source: Royal Society of Chemistry journal article supplement (doi:10.1039/d0ta00763c), 2020-01-01
Supplement: d0ta00763c1.pdf [file d0ta00763c1.pdf]

## Electronic Supplementary Information

### **Platelet-Like CuS Pregnated with Twin Crystal for High Performance Sodium-Ion Storage**

Zuguang Yang,<sup>a</sup> Zhenguo Wu,<sup>\*a</sup> Jie Liu,<sup>b</sup> Yuxia Liu,<sup>c</sup> Shuyan Gao,<sup>d</sup> Jiaao Wang,<sup>e</sup>  
Yao Xiao,<sup>a</sup> Yanjun Zhong,<sup>a</sup> Benhe Zhong,<sup>a</sup> and Xiaodong Guo<sup>a</sup>

<sup>a</sup> School of Chemical Engineering, Sichuan University, Chengdu, 610065, P.R. China

<sup>b</sup> State Key Laboratory Base of Eco-chemical Engineering, College of Chemical Engineering, Qingdao University of Science and Technology, Qingdao 266042, China

<sup>c</sup> The Key Laboratory of Life-Organic Analysis, Key Laboratory of Pharmaceutical Intermediates and Analysis of Natural Medicine, School of Chemistry and Chemical Engineering, Qufu Normal University, Qufu 273165, Shandong, China.

<sup>d</sup> School of Materials Science and Engineering, Henan Normal University, Xinxiang 453007, Henan, China

<sup>e</sup> School of Material Science and Engineering, University of Jinan, Jinan 250022, China

\* Corresponding Author

E-mail: zhenguowu@scu.edu.cn

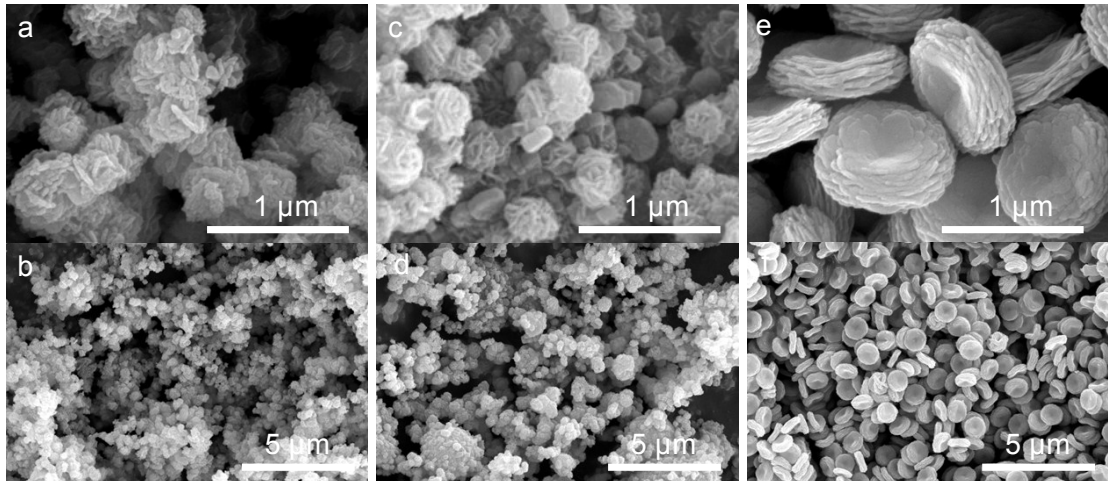

**Fig. S1** The SEM images of materials prepared at 150 °C with different ratio of S/Cu:  
(a-b) S/Cu = 1, (c-d) S/Cu = 2, (e-f) S/Cu = 3.

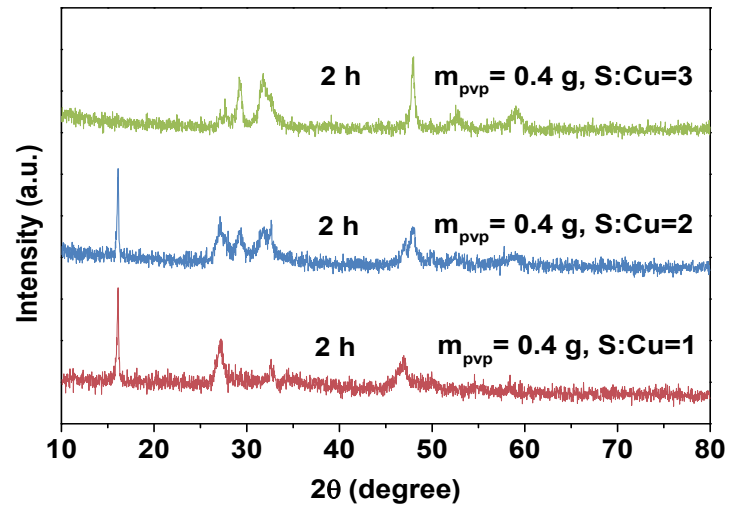

**Fig. S2** The XRD of materials prepared at 150 °C with different ratio of S/Cu = 1, S/Cu = 2 and S/Cu = 3.

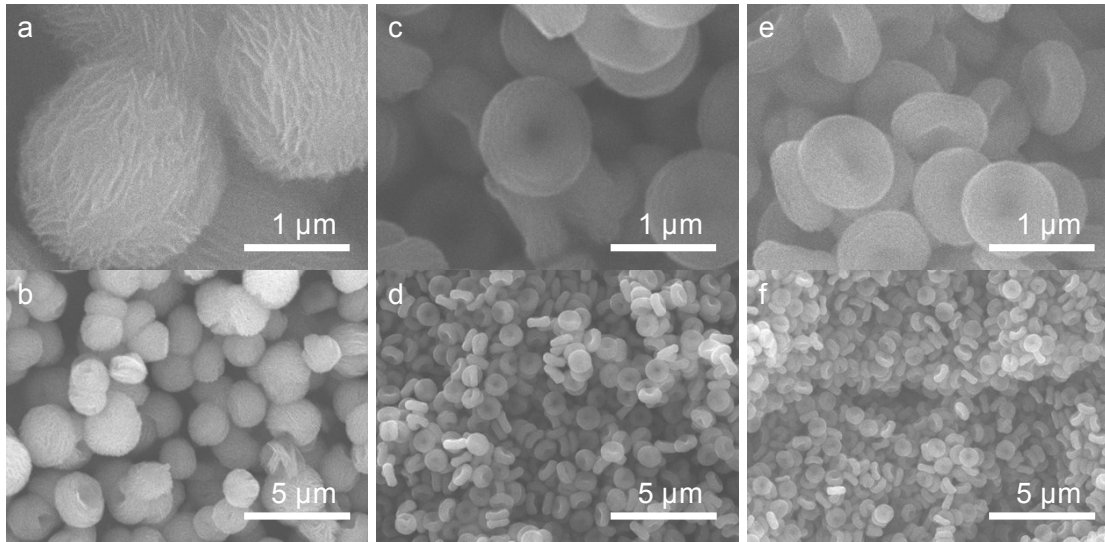

**Fig. S3** The SEM images of materials prepared at 150 °C with different mass of PVP:  
(a-b) 0 g, (c-d) 0.4 g, (e-f) 0.8 g.

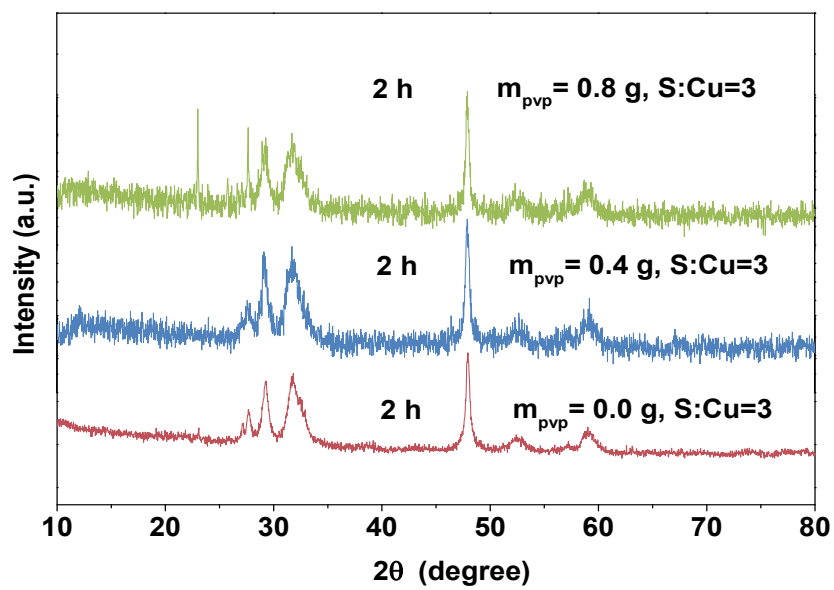

**Fig. S4** The XRD materials prepared at 150 °C with different mass of PVP: 0 g, 0.4 g, 0.8 g.

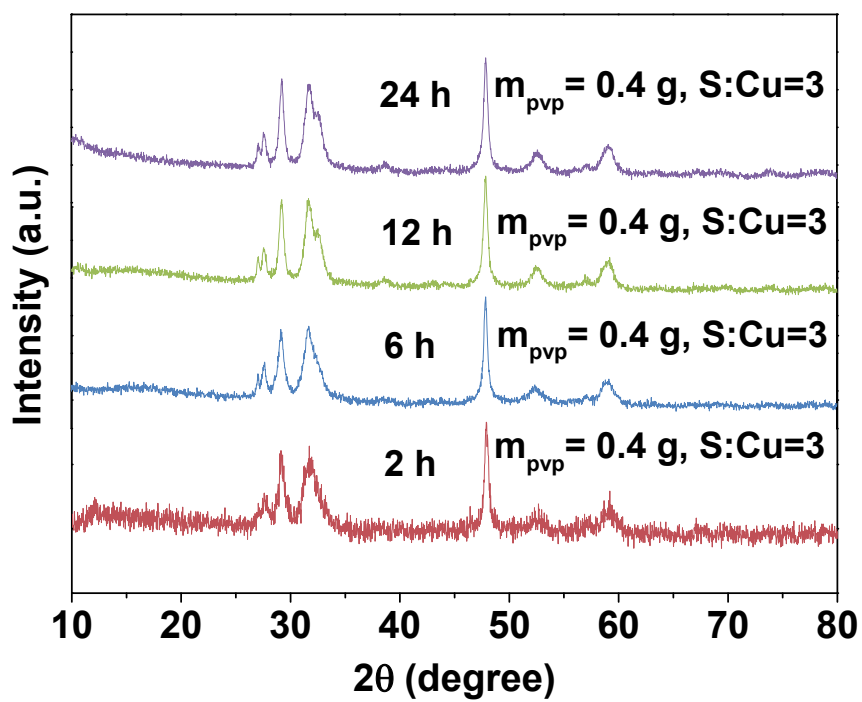

**Fig. S5** The XRD materials prepared at 150 °C with different reaction times: 2 h, 6 h, 12 h, and 24 h.

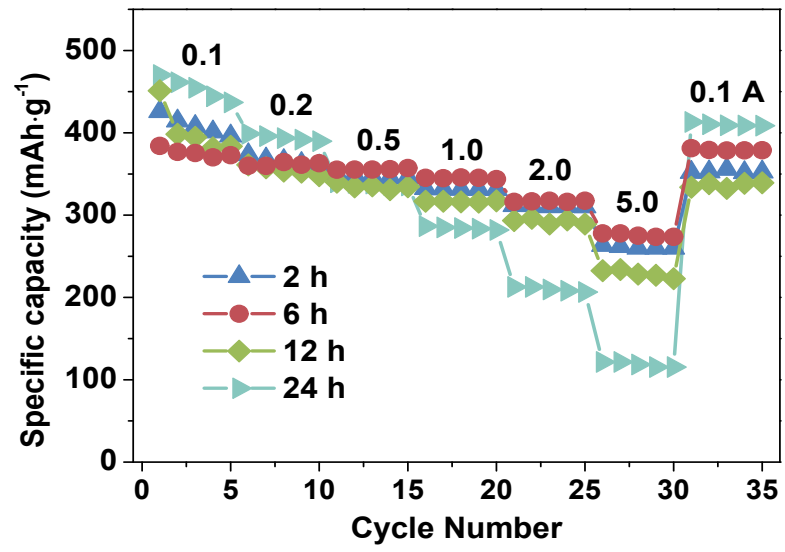

**Fig. S6** The rate performance of all samples with different reaction time.

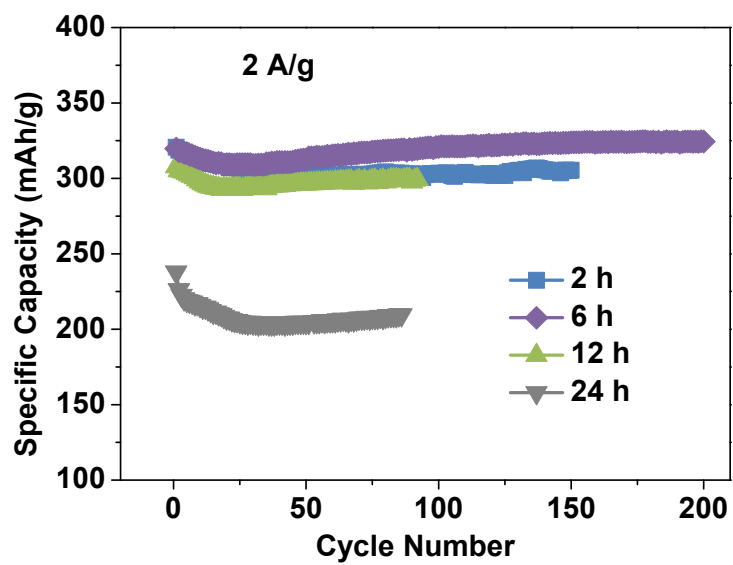

**Fig. S7** The cycle performance of all samples with different reaction time.



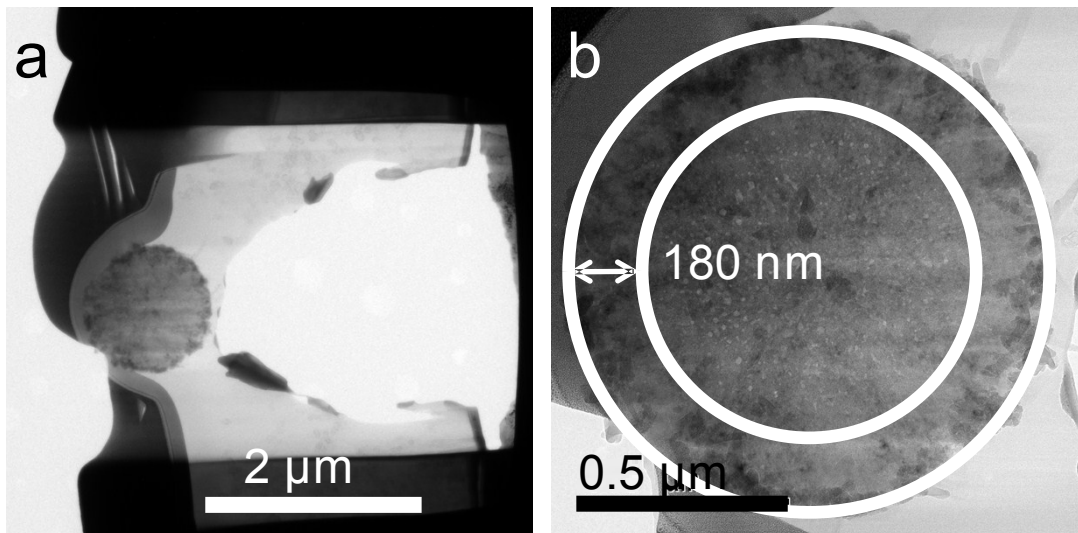

**Fig. S8** (a-b) The TEM image of FIB section for the platelet-like CuS material.

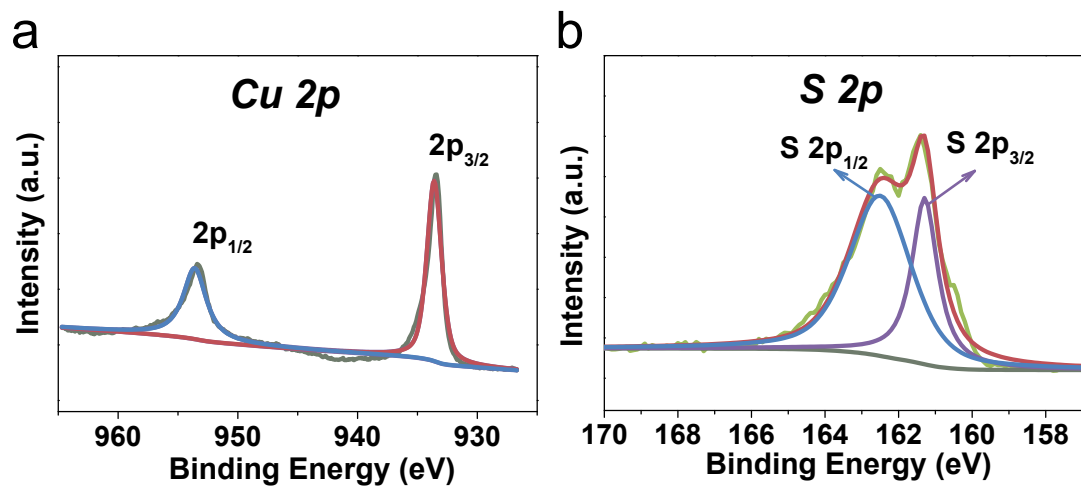

**Fig. S9** High-resolution X-ray photoelectron spectra of the CuS: (a) Cu 2p, (b) S 2p

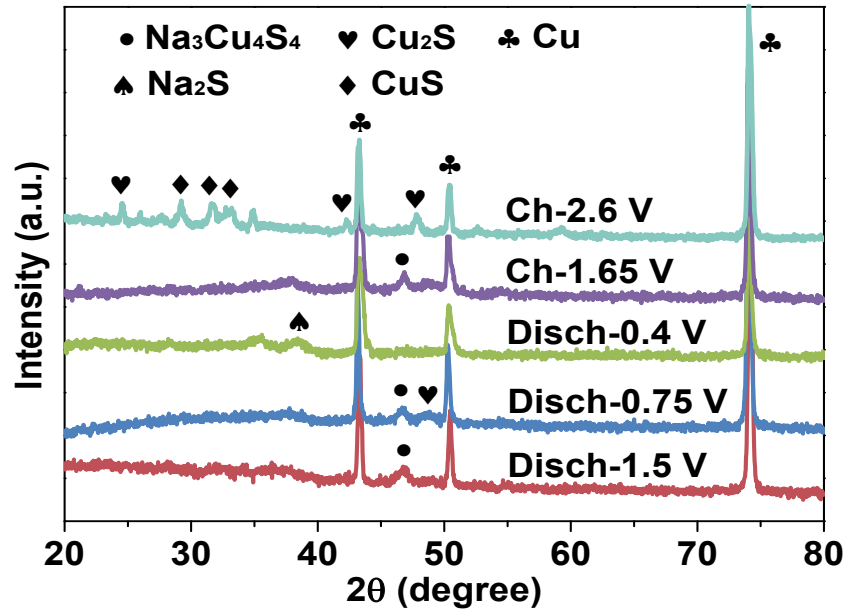

**Fig. S10** The ex-situ XRD patterns obtained from the electrode during charge/discharge process in first cycle: discharged to 1.5 V, discharged to 0.75 V, discharge to 0.4 V, charged to 1.65 V, and charged to 2.6 V.
